# Supplementary material
Source: Springer Nature journal article supplement (https://www.springermedizin.de/resource/supplementary/12885_2007_992_MOESM1_ESM.pdf/9471852)
Supplement: MOESM1 [file 9471852]

Additional Table 4: Gene-environment interaction stratified by gender

*ERCC1* Asn118Asn, *ASE-1* G-21A and *RAI* IVS1 A4364G genotype-specific effects of average smoking intensity and consumption of alcohol on the risk of colorectal cancer

|                                                         | <i>ERCC1</i> Asn118Asn |                               |                  |                       |                |                               |                  |                       |                | <i>ASE-1</i> G-21A |                               |                  |                       |                |                               |                  |                       |                | <i>RAI</i> IVS1 A4364G |                               |                  |                       |                |                               |                  |                       |                |
|---------------------------------------------------------|------------------------|-------------------------------|------------------|-----------------------|----------------|-------------------------------|------------------|-----------------------|----------------|--------------------|-------------------------------|------------------|-----------------------|----------------|-------------------------------|------------------|-----------------------|----------------|------------------------|-------------------------------|------------------|-----------------------|----------------|-------------------------------|------------------|-----------------------|----------------|
|                                                         | Men                    |                               |                  |                       | Women          |                               |                  |                       |                | Men                |                               |                  |                       | Women          |                               |                  |                       |                | Men                    |                               |                  |                       | Women          |                               |                  |                       |                |
|                                                         | SNP                    | N <sub>cases/sub-cohort</sub> | IRR <sup>a</sup> | CI (95%) <sup>b</sup> | P <sup>c</sup> | N <sub>cases/sub-cohort</sub> | IRR <sup>a</sup> | CI (95%) <sup>b</sup> | P <sup>c</sup> | SNP                | N <sub>cases/sub-cohort</sub> | IRR <sup>a</sup> | CI (95%) <sup>b</sup> | P <sup>c</sup> | N <sub>cases/sub-cohort</sub> | IRR <sup>a</sup> | CI (95%) <sup>b</sup> | P <sup>c</sup> | SNP                    | N <sub>cases/sub-cohort</sub> | IRR <sup>a</sup> | CI (95%) <sup>b</sup> | P <sup>c</sup> | N <sub>cases/sub-cohort</sub> | IRR <sup>a</sup> | CI (95%) <sup>b</sup> | P <sup>c</sup> |
| Smoking intensity <sup>d</sup><br>(per 10g tobacco/day) | TT                     | 67 / 122                      | 0.99             | 0.73-1.33             |                | 45 / 88                       | 1.55             | 0.85-2.84             |                | GG                 | 123 / 214                     | 0.99             | 0.80-1.22             |                | 65 / 132                      | 1.65             | 0.97-2.80             |                | AA                     | 131 / 202                     | 1.02             | 0.82-1.26             |                | 58 / 137                      | 1.31             | 0.80-2.14             |                |
|                                                         | CT                     | 78 / 145                      | 0.92             | 0.73-1.16             | 0.82           | 37 / 84                       | 1.83             | 1.07-3.14             | 0.16           | AG                 | 47 / 89                       | 0.92             | 0.68-1.24             | 0.19           | 21 / 64                       | 1.22             | 0.69-2.16             | 0.38           | AG                     | 39 / 97                       | 0.86             | 0.62-1.18             | 0.53           | 32 / 60                       | 1.83             | 1.03-3.25             | 0.44           |
|                                                         | CC                     | 30 / 40                       | 1.02             | 0.74-1.40             |                | 11 / 31                       | 0.91             | 0.46-1.80             |                | AA                 | 6 / 5                         | 8.16             | 0.77-86.29            |                | 7 / 7                         | 2.53             | 0.70-9.14             |                | GG                     | 5 / 9                         | 0.86             | 0.50-1.48             |                | 3 / 6                         | 1.04             | 0.30-3.60             |                |
|                                                         | missing                | 3 / 7                         |                  |                       |                | 4 / 2                         |                  |                       |                | 2 / 6              |                               |                  |                       |                | 4 / 2                         |                  |                       |                | 3 / 6                  |                               |                  |                       | 4 / 2          |                               |                  |                       |                |
| Alcohol intake <sup>e</sup><br>(per 10g/day)            | TT                     | 82 / 171                      | 1.03             | 0.91-1.15             |                | 79 / 154                      | 0.92             | 0.69-1.23             |                | GG                 | 150 / 290                     | 1.05             | 0.98-1.14             |                | 117 / 244                     | 1.09             | 0.91-1.31             |                | AA                     | 153 / 270                     | 1.08             | 0.99-1.19             |                | 100 / 226                     | 1.06             | 0.89-1.27             |                |
|                                                         | CT                     | 99 / 188                      | 1.11             | 1.02-1.21             | 0.15           | 64 / 154                      | 1.15             | 0.94-1.41             | 0.25           | AG                 | 59 / 121                      | 1.11             | 0.96-1.27             | 0.20           | 44 / 104                      | 1.14             | 0.88-1.47             | 0.33           | AG                     | 56 / 136                      | 1.05             | 0.95-1.15             | 0.55           | 60 / 122                      | 1.25             | 0.94-1.66             | 0.24           |
|                                                         | CC                     | 34 / 60                       | 0.91             | 0.75-1.10             |                | 26 / 50                       | 1.28             | 0.97-1.70             |                | AA                 | 7 / 10                        | 0.76             | 0.52-1.12             |                | 8 / 11                        | 0.30             | 0.05-1.69             |                | GG                     | 6 / 13                        | 0.81             | 0.47-1.39             |                | 8 / 10                        | 0.64             | 0.29-1.38             |                |
|                                                         | missing                | 3 / 11                        |                  |                       |                | 6 / 4                         |                  |                       |                | 2 / 9              |                               |                  |                       |                | 6 / 3                         |                  |                       |                | 3 / 11                 |                               |                  |                       | 7 / 4          |                               |                  |                       |                |

a) IRR: incidence rate ratio

b) CI: 95% confidence interval

c) P: test for interaction

d) Risk estimates for ever smokers only. Adjusted for smoking status (present/former/never), intake of alcohol, fruits/vegetables, fish/poultry, red and processed meat, dietary fibres, BMI and hormone replacement therapy

e) Risk estimates for alcohol consumers only. Adjusted for average smoking intensity, fruits/vegetables, fish/poultry, red and processed meat, dietary fibres, BMI and hormone replacement therapy
